# Supplementary material
Source: MDPI journal article supplement (https://www.mdpi.com/2073-8994/15/6/1149)

**Table S1.** The mean ( $\bar{X}$ ), standard error (SE) and phenotypic coefficient of variation (CV %) for perianth achromatic brightness and floral organs' sizes in distinct *I. pumila* color morphs. Different letters indicate significant differences between color morphs (all  $P < 0.05$ , one-way ANOVA).

| Trait                      | Color morph | <i>n</i> | $\bar{X}$ |          | SE    | CV %  |
|----------------------------|-------------|----------|-----------|----------|-------|-------|
| Achromatic brightness      |             |          |           |          |       |       |
|                            | violet      | 211      | 0.236     | <b>b</b> | 0.003 | 17.96 |
|                            | blue        | 157      | 0.269     | <b>a</b> | 0.004 | 20.56 |
|                            | yellow      | 15       | 0.465     | <b>c</b> | 0.018 | 14.89 |
| Flower stem height         |             |          |           |          |       |       |
|                            | violet      | 211      | 94.54     | <b>a</b> | 1.30  | 19.94 |
|                            | blue        | 157      | 89.57     | <b>a</b> | 1.70  | 23.82 |
|                            | yellow      | 15       | 94.58     | <b>a</b> | 2.75  | 11.25 |
| CS fall                    |             |          |           |          |       |       |
|                            | violet      | 211      | 334.8     | <b>a</b> | 2.9   | 12.45 |
|                            | blue        | 157      | 325.0     | <b>a</b> | 3.3   | 12.60 |
|                            | yellow      | 15       | 320.6     | <b>a</b> | 6.7   | 8.09  |
| CS style branch            |             |          |           |          |       |       |
|                            | violet      | 211      | 195.9     | <b>a</b> | 1.3   | 9.97  |
|                            | blue        | 157      | 194.7     | <b>a</b> | 1.6   | 9.96  |
|                            | yellow      | 15       | 193.0     | <b>a</b> | 5.2   | 10.36 |
| CS standard                |             |          |           |          |       |       |
|                            | violet      | 211      | 329.4     | <b>a</b> | 3.1   | 13.63 |
|                            | blue        | 157      | 320.4     | <b>a</b> | 3.4   | 13.41 |
|                            | yellow      | 15       | 319.6     | <b>a</b> | 5.9   | 7.21  |
| Fall-style branch CS ratio |             |          |           |          |       |       |
|                            | violet      | 211      | 1.713     | <b>a</b> | 0.012 | 10.05 |
|                            | blue        | 157      | 1.673     | <b>a</b> | 0.014 | 10.11 |
|                            | yellow      | 15       | 1.666     | <b>a</b> | 0.024 | 5.50  |

**Table S2.** The perianth achromatic brightness in three distinct *I. pumila* color morphs. The mean ( $\bar{X}$ ), standard error (SE) and phenotypic coefficient of variation (CV %) were calculated for each trait. The one-way ANOVA was used to compare the brightness between pollinated and non-pollinated flowers. For all ANOVAs the  $df = 1$ .

| Color morph | Pollinated flower |           |       |       | Non-pollinated flower |           |       |       | ANOVA    |          |
|-------------|-------------------|-----------|-------|-------|-----------------------|-----------|-------|-------|----------|----------|
|             | <i>n</i>          | $\bar{X}$ | SE    | CV %  | <i>n</i>              | $\bar{X}$ | SE    | CV %  | <i>F</i> | <i>P</i> |
| Violet      | 110               | 0.239     | 0.004 | 19.04 | 101                   | 0.232     | 0.004 | 16.53 | 1.05     | 0.306    |
| Blue        | 74                | 0.282     | 0.007 | 20.65 | 83                    | 0.258     | 0.006 | 19.46 | 7.86     | 0.006    |
| Yellow      | 9                 | 0.460     | 0.017 | 11.34 | 6                     | 0.473     | 0.039 | 20.01 | 0.12     | 0.738    |

**Table S3.** Discriminant function analysis of the difference in the mean shape of all three floral organs for both symmetric and asymmetric components of shape variation among pollinated and non-pollinated *I. pumila* flowers.

| Floral organ | Symmetric component |          | Asymmetric component |          |
|--------------|---------------------|----------|----------------------|----------|
|              | Procrustes distance | <i>p</i> | Procrustes distance  | <i>p</i> |
| Fall         | 0.005               | 0.234    | 0.002                | 0.097    |
| Style branch | 0.006               | 0.131    | 0.001                | 0.924    |
| Standard     | 0.007               | 0.269    | 0.002                | 0.961    |

**Figure S1.** The mean shape diagrams of floral organs: fall (a), style branch (b) and standard (c), in pollinated (black line) and non-pollinated (gray line) *I. pumila* flowers. All diagrams were exaggerated 10-fold to make them easily visible.

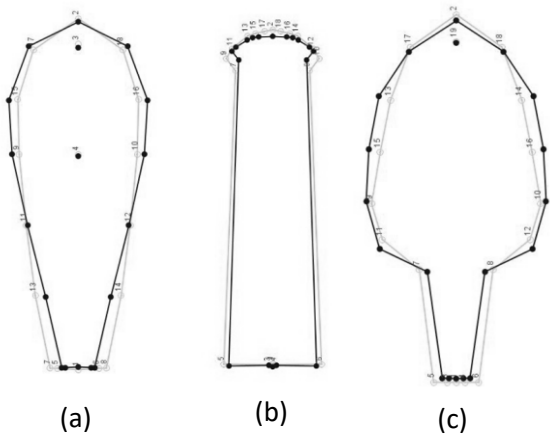

Supplement: s1 [file s1 › symmetry-2383735-supplementary.pdf]
